# Supplementary material for: Unlocking comprehensive molecular design across all scenarios with large language model and unordered chemical language
Source: Royal Society of Chemistry journal article supplement (doi:10.1039/d4sc03744h), 2024-01-01
Supplement: d4sc03744h1.pdf [file d4sc03744h1.pdf]

## Supplementary Information

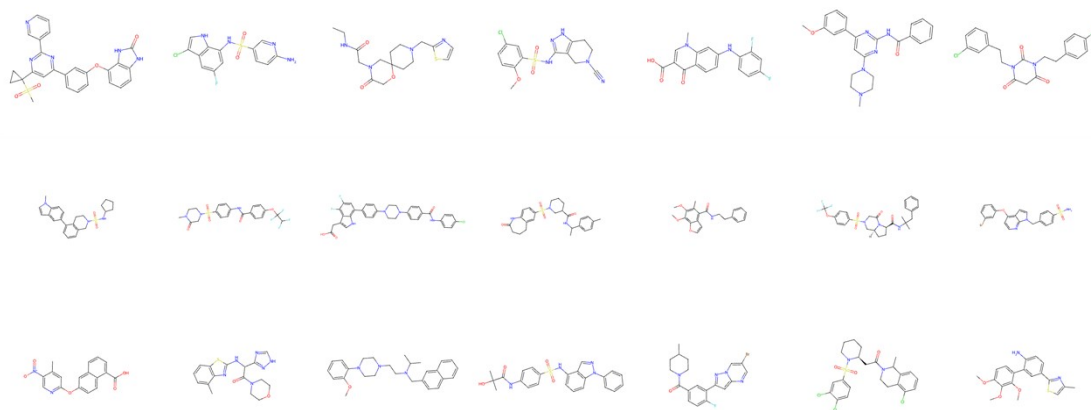

**Fig. S1.** Visualization of molecules generated in the de novo design task.

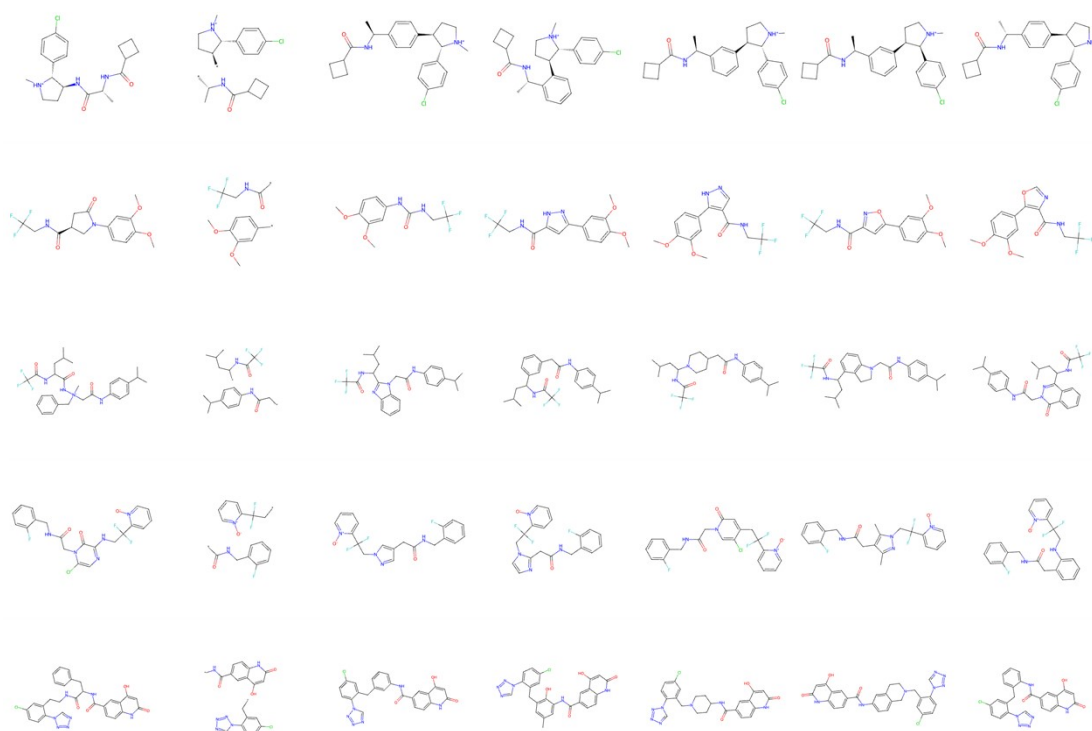

**Fig. S2.** Visualization of molecules generated in the linker design task. The first column illustrates the reference molecules, the second column depicts the retained segments, and the subsequent columns showcase the newly generated molecules.

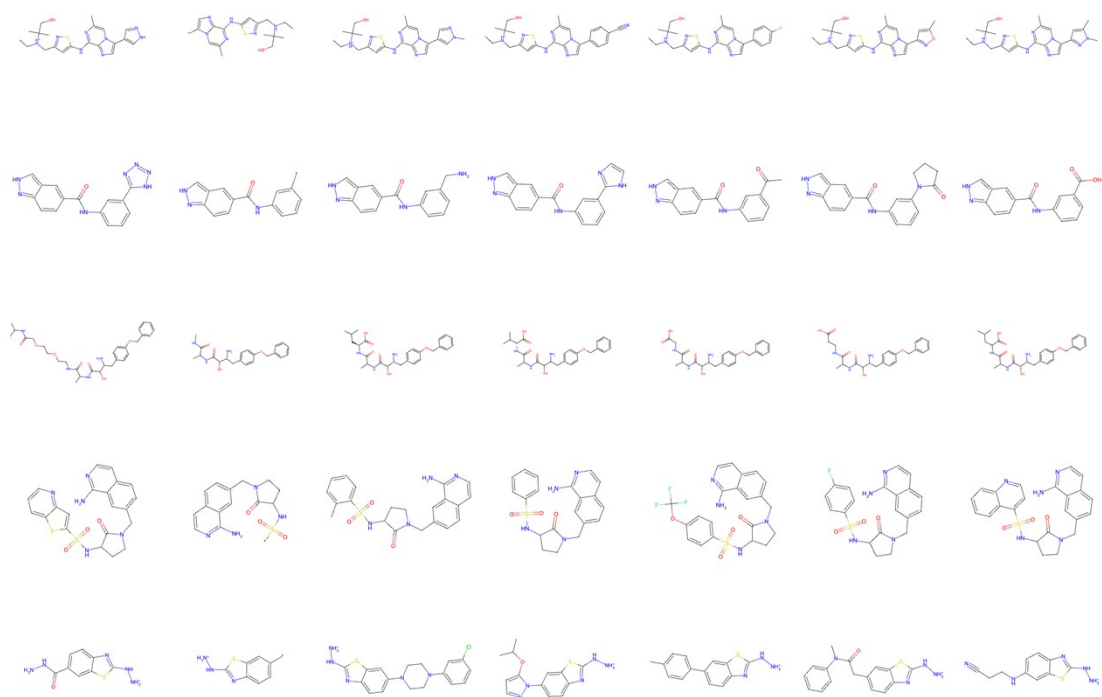

**Fig. S3.** Visualization of molecules generated in the R-group exploration task. The first column illustrates the reference molecules, the second column depicts the retained segments, and the subsequent columns showcase the newly generated molecules.

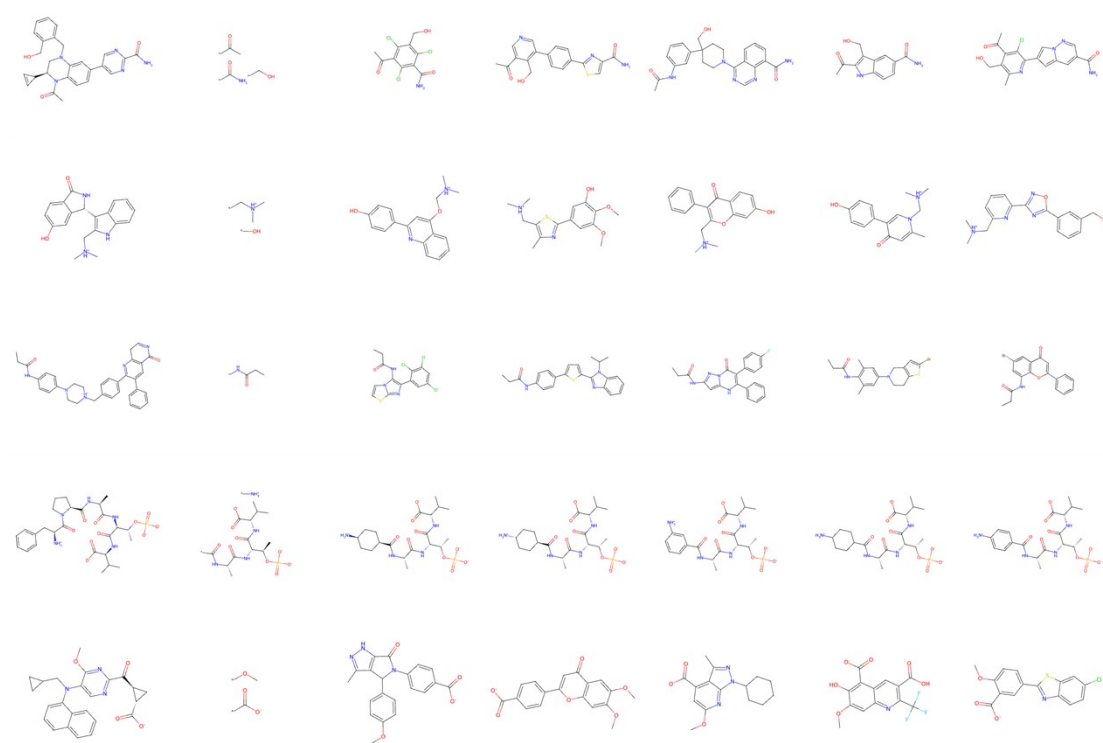

**Fig. S4.** Visualization of molecules generated in the scaffold hopping task. The first column illustrates the reference molecules, the second column depicts the retained segments, and the subsequent columns showcase the newly generated molecules.

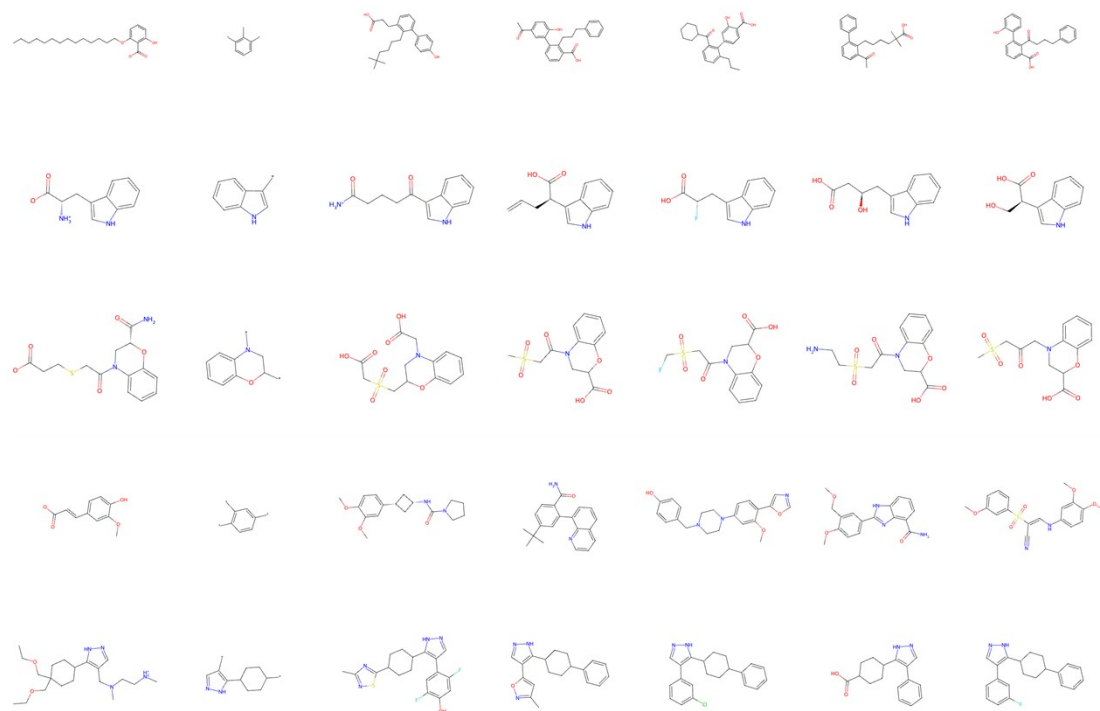

**Fig. S5.** Visualization of molecules generated in the side chain optimization task. The first column illustrates the reference molecules, the second column depicts the retained segments, and the subsequent columns showcase the newly generated molecules.
